# Supplementary material for: Lymphoid-specific helicase inhibits cervical cancer cells ferroptosis by promoting Nrf2 expression
Source: PeerJ. 2023 Nov 28;11:e16451. doi: 10.7717/peerj.16451 (PMC10691353; doi:10.7717/peerj.16451)
Supplement: Supplemental Information 3 [file peerj-11-16451-s003.xlsx]

## Sheet: fig1C
Paired normal	CC
0.97957	2.53151
1.11746	2.34567
0.80677	2.2974
1.21438	3.81055
0.99325	2.28153
0.58246	1.94531
0.93318	0.88884
1.76568	1.76541
0.51059	2.75108
2.07085	1.55833
1.0869	1.56917
0.80677	1.6245
0.77929	4.25748
0.50008	2.86791
0.85277	2.41162
