# Supplementary material for: Lymphoid-specific helicase inhibits cervical cancer cells ferroptosis by promoting Nrf2 expression
Source: PeerJ. 2023 Nov 28;11:e16451. doi: 10.7717/peerj.16451 (PMC10691353; doi:10.7717/peerj.16451)
Supplement: Supplemental Information 4 [file peerj-11-16451-s004.xlsx]

## Sheet: fig2A
Area	Aisle	CT	TM	Type	Gene	The sample name
A01	FAM	11.35	79	Unknown	Actin	ICE
A02	FAM	11.39	78	Unknown	Actin	ICE
A03	FAM	11.42	78.5	Unknown	Actin	ICE
A04	FAM	11.42	79.5	Unknown	Actin	CASKI
A05	FAM	11.38	81.5	Unknown	Actin	CASKI
A06	FAM	11.43	79.5	Unknown	Actin	CASKI
A07	FAM	11.37	81	Unknown	Actin	SIHA
A08	FAM	11.31	78	Unknown	Actin	SIHA
A09	FAM	11.39	81.5	Unknown	Actin	SIHA
A10	FAM	11.28	80	Unknown	Actin	HELA
A11	FAM	11.34	78	Unknown	Actin	HELA
A12	FAM	11.38	78.5	Unknown	Actin	HELA
B01	FAM	11.46	81	Unknown	Actin	C4-1
B02	FAM	11.37	81.5	Unknown	Actin	C4-1
B03	FAM	11.39	80.5	Unknown	Actin	C4-1
B04	FAM	19.35	80	Unknown	HELLS	ICE
B05	FAM	19.41	80	Unknown	HELLS	ICE
B06	FAM	19.14	80.5	Unknown	HELLS	ICE
B07	FAM	18.24	79.5	Unknown	HELLS	CASKI
B08	FAM	18.39	81	Unknown	HELLS	CASKI
B09	FAM	18.34	81.5	Unknown	HELLS	CASKI
B10	FAM	18.14	80.5	Unknown	HELLS	SIHA
B11	FAM	17.9	80	Unknown	HELLS	SIHA
B12	FAM	18.06	78	Unknown	HELLS	SIHA
C01	FAM	18.36	78	Unknown	HELLS	HELA
C02	FAM	18.26	78.5	Unknown	HELLS	HELA
C03	FAM	18.44	79	Unknown	HELLS	HELA
C01	FAM	18.95	78	Unknown	HELLS	C4-1
C02	FAM	18.88	78.5	Unknown	HELLS	C4-1
C03	FAM	18.73	79	Unknown	HELLS	C4-1

## Sheet: fig2A-2
	Actin	HELLS	CT2-CT1		∆∆CT	2-∆∆CT
	CT1	CT2	∆CT	average ∆CT of ICE	∆∆CT	2-∆∆CT	average 2-∆∆CT of ICE	2-∆∆CT/average 2-∆∆CT of ICE	aveage
ICE	11.35	19.35	8	7.91333	0.0866667	0.941696	1.00461	0.937375
	11.39	19.41	8.02	7.91333	0.106667	0.928731	1.00461	0.92447
	11.42	19.14	7.72	7.91333	-0.193333	1.1434	1.00461	1.13816	1	0.11982
			7.91333			1.00461
CASKI	11.42	18.24	6.82	7.91333	-1.09333	2.13366	1.00461	2.12387
	11.38	18.39	7.01	7.91333	-0.903333	1.87038	1.00461	1.8618
	11.43	18.34	6.91	7.91333	-1.00333	2.00463	1.00461	1.99543	1.9937	0.131045
SIHA	11.37	18.14	6.77	7.91333	-1.14333	2.20891	1.00461	2.19877
	11.31	17.9	6.59	7.91333	-1.32333	2.50244	1.00461	2.49095
	11.39	18.06	6.67	7.91333	-1.24333	2.36745	1.00461	2.35659	2.34877	0.146247
HELA	11.28	18.36	7.08	7.91333	-0.833333	1.7818	1.00461	1.77362
	11.34	18.26	6.92	7.91333	-0.993333	1.99078	1.00461	1.98164
	11.38	18.44	7.06	7.91333	-0.853333	1.80667	1.00461	1.79838	1.85122	0.113631
C4-1	11.46	18.95	7.49	7.91333	-0.423333	1.34102	1.00461	1.33487
	11.37	18.88	7.51	7.91333	-0.403333	1.32256	1.00461	1.31649
	11.39	18.73	7.34	7.91333	-0.573333	1.48796	1.00461	1.48113	1.3775	0.090218

## Sheet: fig2B
	ICE	Caski	SiHa	HeLa	C4-1
	0.231	0.358	0.552	0.342	0.246
HELLS	0.254	0.366	0.486	0.366	0.221
	0.274	0.382	0.527	0.371	0.232
	0.682	0.675	0.668	0.685	0.706
ACTIN	0.692	0.681	0.692	0.674	0.711
	0.706	0.693	0.678	0.669	685
	0.33871	0.53037	0.826347	0.49927	0.348442
HELLS/ACTIN	0.367052	0.537445	0.702312	0.543027	0.31083
	0.388102	0.551227	0.777286	0.554559	0.000338686

## Sheet: fig2C
Area	Aisle	CT	TM	Type	Gene	The sample name
A01	FAM	11.43	79	Unknown	Actin	Control
A02	FAM	11.49	78.5	Unknown	Actin	Control
A03	FAM	11.47	80.5	Unknown	Actin	Control
A04	FAM	11.42	81	Unknown	Actin	Control
A05	FAM	11.38	82	Unknown	Actin	Control
A06	FAM	11.43	78	Unknown	Actin	Control
A07	FAM	19.28	78.5	Unknown	HELLS	HELLS-OE
A08	FAM	19.46	79.5	Unknown	HELLS	HELLS-OE
A09	FAM	19.19	81	Unknown	HELLS	HELLS-OE
A10	FAM	18.01	80.5	Unknown	HELLS	HELLS-OE
A11	FAM	18.05	79.5	Unknown	HELLS	HELLS-OE
A12	FAM	17.96	82	Unknown	HELLS	HELLS-OE

## Sheet: fig2C-2
	Actin	HELLS	CT2-CT1		∆∆CT	2-∆∆CT
	CT1	CT2	∆CT	average ∆CT of ICE	∆∆CT	2-∆∆CT	average 2-∆∆CT of ICE	2-∆∆CT/average 2-∆∆CT of ICE	aveage
ICE	11.43	19.28	7.85	7.84667	0.00333333	0.997692	1.00251	0.995196
	11.49	19.46	7.97	7.84667	0.123333	0.918064	1.00251	0.915767
	11.47	19.19	7.72	7.84667	-0.126667	1.09177	1.00251	1.08904	1	0.0867347
			7.84667			1.00251
CASKI	11.42	18.01	6.59	7.84667	-1.25667	2.38943	1.00251	2.38345
	11.38	18.05	6.67	7.84667	-1.17667	2.26054	1.00251	2.25488
	11.43	17.96	6.53	7.84667	-1.31667	2.4909	1.00251	2.48467	2.37433	0.115163

## Sheet: fig2D
	Control	HELLS-OE
HELLS	0.18	0.27
	0.15	0.34
	0.14	0.31
β-actin	0.65	0.62
	0.66	0.67
	0.61	0.63
HELLS/β-actin	0.276923	0.435484
	0.227273	0.507463
	0.229508	0.492063
AVE	0.244568
	1.13229	1.78062
	0.929282	2.07493
	0.938423	2.01197
AVE	1	1.95584
STD	0.114662	0.154975

## Sheet: fig2E
	Control		HELLS-OE
	0.192		0.142
0	0.135		0.117
	0.141		0.157
	0.311		0.269
24	0.287		0.229
	0.206		0.325
	0.571		0.617
48	0.496		0.574
	0.477		0.712
	0.941		1.203
72	0.843		1.159
	0.758		1.342
	1.134		1.396
96	1.031		1.305
	0.914		1.562
	AVE	STD	AVE	STD
0	0.156	0.0313209	0.138667	0.0202073
24	0.268	0.0550182	0.274333	0.0482217
48	0.514667	0.0497024	0.634333	0.070614
72	0.847333	0.0915769	1.23467	0.0955214
96	1.02633	0.110074	1.421	0.130311

## Sheet: fig2F
Control	HELLS-OE		Control	HELLS-OE
97	242	AVE	113.667	232.667
119	237	STD	14.7422	12.0968
125	219
