# Supplementary material for: Lymphoid-specific helicase inhibits cervical cancer cells ferroptosis by promoting Nrf2 expression
Source: PeerJ. 2023 Nov 28;11:e16451. doi: 10.7717/peerj.16451 (PMC10691353; doi:10.7717/peerj.16451)
Supplement: Supplemental Information 5 [file peerj-11-16451-s005.xlsx]

## Sheet: fig3A
Area	Aisle	CT	TM	Type	Gene	The sample name
A01	FAM	12.11	82	Unknown	Actin	si-NC
A02	FAM	12.09	78.5	Unknown	Actin	si-NC
A03	FAM	12.19	80	Unknown	Actin	si-NC
A04	FAM	12.15	81.5	Unknown	Actin	si-HELLS
A05	FAM	12.09	81	Unknown	Actin	si-HELLS
A06	FAM	12.11	79.5	Unknown	Actin	si-HELLS
A07	FAM	17.56	82	Unknown	HELLS	si-NC
A08	FAM	17.54	79	Unknown	HELLS	si-NC
A09	FAM	17.3	81	Unknown	HELLS	si-NC
A10	FAM	18.39	82	Unknown	HELLS	si-HELLS
A11	FAM	18.54	79.5	Unknown	HELLS	si-HELLS
A12	FAM	18.69	80	Unknown	HELLS	si-HELLS

## Sheet: fig3A-2
	Actin	HELLS	CT2-CT1		∆∆CT	2-∆∆CT
	CT1	CT2	∆CT	average ∆CT of si-NC	∆∆CT	2-∆∆CT	average 2-∆∆CT of ICE	2-∆∆CT/average 2-∆∆CT of ICE	aveage
si-NC	12.11	17.56	5.45	5.33667	0.113333	0.92445	1.00634	0.918623
	12.09	17.54	5.45	5.33667	0.113333	0.92445	1.00634	0.918623
	12.19	17.3	5.11	5.33667	-0.226667	1.17013	1.00634	1.16275	1	0.140949
			5.33667			1.00634
SI-HELLS	12.15	18.39	6.24	5.33667	0.903333	0.53465	1.00634	0.53128
	12.09	18.54	6.45	5.33667	1.11333	0.462225	1.00634	0.459312
	12.11	18.69	6.58	5.33667	1.24333	0.422396	1.00634	0.419733	0.470108	0.0565518

## Sheet: fig3B
	si-nc	si-hells
HELLS	0.42	0.21
	0.46	0.2
	0.4	0.25
β-actin	0.71	0.7
	0.69	0.66
	0.72	0.68
HELLS/β-actin	0.591549	0.3
	0.666667	0.30303
	0.555556	0.367647
AVE	0.604591
	0.97843	0.496204
	1.10267	0.501216
	0.918896	0.608093
ave	1	0.535171
std	0.0937691	0.063202

## Sheet: fig3C
	si-NC		si-HELLS
	0.151		0.101
0	0.092		0.153
	0.102		0.119
	0.289		0.191
24	0.191		0.282
	0.259		0.216
	0.551		0.362
48	0.435		0.491
	0.466		0.397
	0.925		0.586
72	0.743		0.762
	0.834		0.628
	1.139		0.722
96	0.924		0.863
	1.043		0.753
	AVE	STD	AVE	STD
0	0.115	0.0315753	0.124333	0.0264071
24	0.246333	0.0502129	0.229667	0.0470142
48	0.484	0.0600583	0.416667	0.0667108
72	0.834	0.091	0.658667	0.0919203
96	1.03533	0.107705	0.779333	0.0740968

## Sheet: fig3D
Control	HELLS-OE		Control	HELLS-OE
246	162	AVE	250.667	138.333
235	120	STD	18.4481	21.5019
271	133
