# Supplementary material for: Lymphoid-specific helicase inhibits cervical cancer cells ferroptosis by promoting Nrf2 expression
Source: PeerJ. 2023 Nov 28;11:e16451. doi: 10.7717/peerj.16451 (PMC10691353; doi:10.7717/peerj.16451)
Supplement: Supplemental Information 6 [file peerj-11-16451-s006.xlsx]

## Sheet: fig4A
1.382	0.672	0.896	0.931
1.153	0.786	0.799	1.063
1.055	0.629	0.738	0.905
		SI-HELLS
	si-NC	CONTROL	ZVAD-FMK	FERROSTATIN-1
AVE	1.19667	0.695667	0.811	0.966333
STD	0.167816	0.0811316	0.0796806	0.0847191

## Sheet: fig4C
1.209	0.578	0.928
1.321	0.755	1.116
1.526	0.638	0.911
	Control	ERASTIN	ERASTIN+HELLS-OE
AVE	1.352	0.657	0.985
STD	0.160758	0.0900167	0.113767
