# Supplementary material for: Lymphoid-specific helicase inhibits cervical cancer cells ferroptosis by promoting Nrf2 expression
Source: PeerJ. 2023 Nov 28;11:e16451. doi: 10.7717/peerj.16451 (PMC10691353; doi:10.7717/peerj.16451)
Supplement: Supplemental Information 7 [file peerj-11-16451-s007.xlsx]

## Sheet: fig5B
Area	Aisle	CT	TM	Type	Gene	The sample name
A01	FAM	11.32	81	Unknown	Actin	Control
A02	FAM	11.37	81	Unknown	Actin	Control
A03	FAM	11.31	79	Unknown	Actin	Control
A04	FAM	11.39	81.5	Unknown	Actin	HELLS-OE
A05	FAM	11.32	80.5	Unknown	Actin	HELLS-OE
A06	FAM	11.33	79	Unknown	Actin	HELLS-OE
A07	FAM	11.29	79	Unknown	Actin	HELLS-OE+si-NRF2
A08	FAM	11.35	80.5	Unknown	Actin	HELLS-OE+si-NRF3
A09	FAM	11.32	82	Unknown	Actin	HELLS-OE+si-NRF4
A10	FAM	19.11	80.5	Unknown	NRF2	Control
A11	FAM	19.21	81.5	Unknown	NRF2	Control
A12	FAM	19.33	80	Unknown	NRF2	Control
B01	FAM	18.46	79.5	Unknown	NRF2	HELLS-OE
B02	FAM	18.24	79	Unknown	NRF2	HELLS-OE
B03	FAM	18.24	80.5	Unknown	NRF2	HELLS-OE
B04	FAM	19.51	80	Unknown	NRF2	HELLS-OE+si-NRF2
B05	FAM	19.33	81	Unknown	NRF2	HELLS-OE+si-NRF3
B06	FAM	19.46	80.5	Unknown	NRF2	HELLS-OE+si-NRF4

## Sheet: fig5B-2
	Actin	NRF2	CT2-CT1		∆∆CT	2-∆∆CT
	CT1	CT2	∆CT	average ∆CT of Control	∆∆CT	2-∆∆CT	average 2-∆∆CT of ICE	2-∆∆CT/average 2-∆∆CT of ICE	aveage
Control	11.32	19.11	7.79	7.88333	-0.0933333	1.06683	1.00231	1.06437
	11.37	19.21	7.84	7.88333	-0.0433333	1.03049	1.00231	1.02811
	11.31	19.33	8.02	7.88333	0.136667	0.909618	1.00231	0.907518	1	0.0821176
			7.88333			1.00231
HELLS-OE	11.39	18.46	7.07	7.88333	-0.813333	1.75727	1.00231	1.75321
	11.32	18.24	6.92	7.88333	-0.963333	1.94981	1.00231	1.94531
	11.33	18.24	6.91	7.88333	-0.973333	1.96337	1.00231	1.95884	1.88579	0.115013
HELLS-OE+si-NRF2	11.29	19.51	8.22	7.88333	0.336667	0.791869	1.00231	0.79004
	11.35	19.33	7.98	7.88333	0.0966667	0.935191	1.00231	0.933032
	11.32	19.46	8.14	7.88333	0.256667	0.83702	1.00231	0.835087	0.85272	0.0731084

## Sheet: fig5D
	Control	HELLS-OE	HELLS-OE+siNRF2
NRF2	0.23	0.39	0.17
	0.31	0.42	0.21
	0.28	0.44	0.24
β-actin	0.68	0.61	0.62
	0.73	0.63	0.64
	0.71	0.62	0.63
NRF2/β-actin	0.338235	0.639344	0.274194
	0.424658	0.666667	0.328125
	0.394366	0.709677	0.380952
AVE	0.385753
	0.876818	1.65739	0.710801
	1.10085	1.72822	0.850609
	1.02233	1.83972	0.987555
ave	1	1.74178	0.849655
std	0.113674	0.0919163	0.13838

## Sheet: fig5E
	Control		HELLS-OE		HELLS-OE+siNRF2
	0.181		0.16		0.181
0	0.163		0.1		0.132
	0.101		0.162		0.109
	0.309		0.316		0.317
24	0.249		0.221		0.299
	0.226		0.294		0.203
	0.592		0.699		0.639
48	0.528		0.561		0.579
	0.481		0.696		0.535
	0.996		1.423		1.095
72	0.806		1.186		0.947
	0.801		1.336		0.918
	1.196		1.661		1.254
96	0.968		1.347		1.189
	0.951		1.486		1.021
	AVE	STD	AVE	STD	AVE	STD
0	0.148333	0.0419682	0.140667	0.0352326	0.140667	0.0367741
24	0.261333	0.0428525	0.277	0.0497293	0.273	0.0612862
48	0.533667	0.0557165	0.652	0.0788226	0.584333	0.0522047
72	0.867667	0.111168	1.315	0.119887	0.986667	0.0949333
96	1.03833	0.136808	1.498	0.157344	1.15467	0.120234

## Sheet: fig5G
Control	HELLS-OE	HELLS-OE+siNRF2		Control	HELLS-OE	HELLS-OE+siNRF2
132	268	193	AVE	118	244	166
112	223	153	STD	12.1655	22.6495	23.388
110	241	152
