# Supplementary material for: Lymphoid-specific helicase inhibits cervical cancer cells ferroptosis by promoting Nrf2 expression
Source: PeerJ journal article supplement (doi:10.7717/peerj.16451), 2023-11-28

Fig2B HELLS

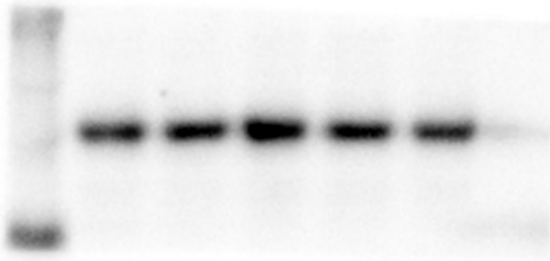

Fig2B actin

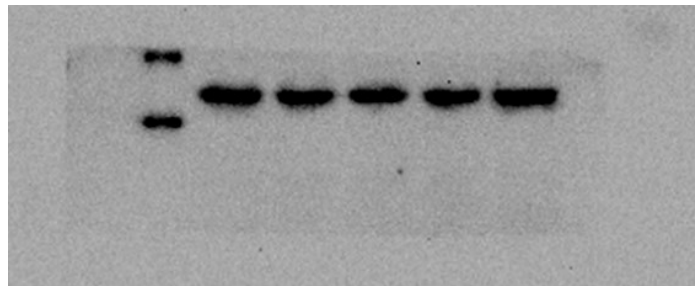

Fig2D HELLS

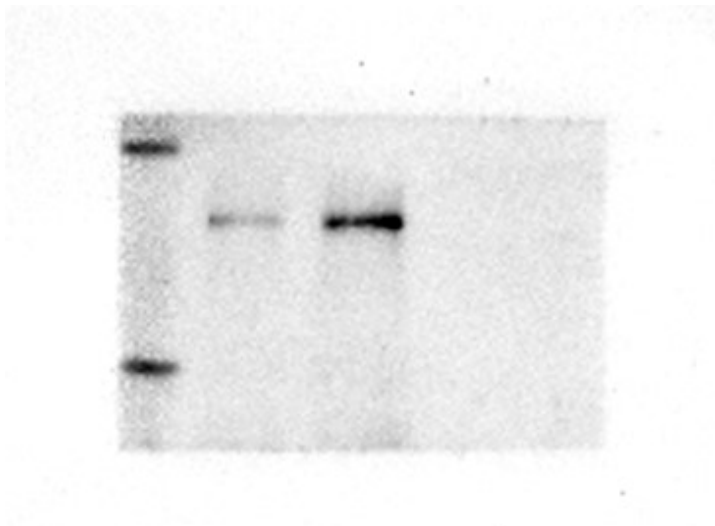

Fig2D actin

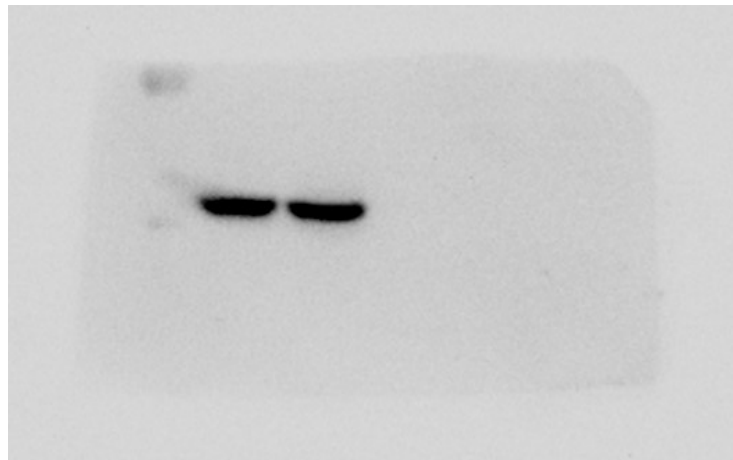

Fig3B HELLS

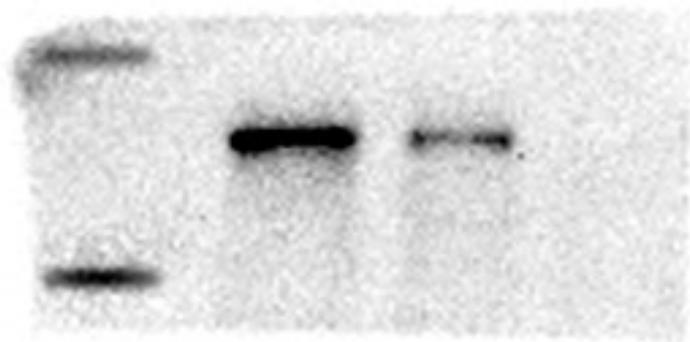

Fig3B actin

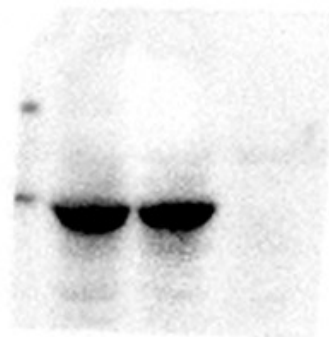

Fig5C NRF2

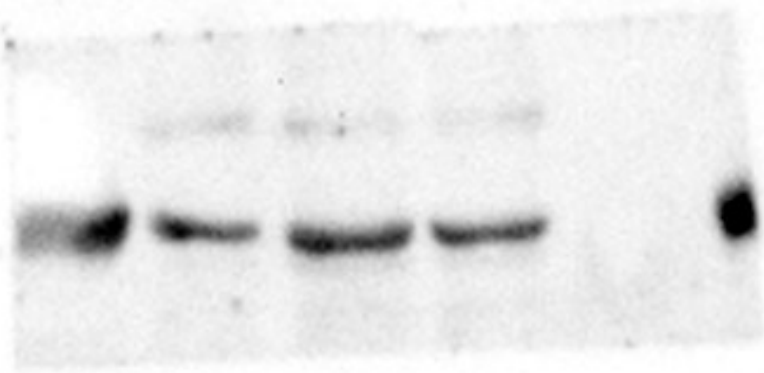

Fig5C actin

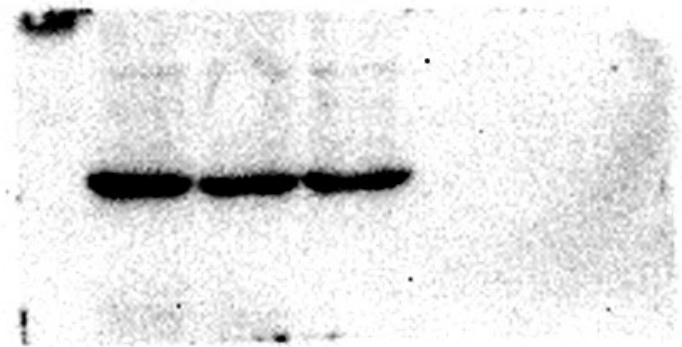

Supplement: western_blotting.pdf [file western_blotting.pdf]
